# Supplementary material
Source: MDPI journal article supplement (https://www.mdpi.com/2073-4441/12/10/2746)
Supplement: s1 [file s1]

## Supplementary Tables

**Table S1.** Pearson correlations for heavy metals in wastewater and surface waters.

|         | Zinc     | Copper   | Cadmium  | Iron    | Lead |
|---------|----------|----------|----------|---------|------|
| Zinc    | 1        |          |          |         |      |
| Copper  | −0.914** | 1        |          |         |      |
| Cadmium | −0.971** | 0.940**  | 1        |         |      |
| Iron    | 0.819**  | −0.671** | −0.786** | 1       |      |
| Lead    | 0.898**  | −0.744** | −0.863** | 0.737** | 1    |

\*\*. Correlation is significant at the 0.01 level (2-tailed).

**Table S2.** ANOVA for heavy metals in wastewater and surface waters.

|          |                | Sum of Squares | df  | Mean Square | F     | Sig.  |
|----------|----------------|----------------|-----|-------------|-------|-------|
| Month    | Between Groups | 0.027          | 2   | 0.013       | 0.004 | 0.996 |
|          | Within Groups  | 312.702        | 104 | 3.007       |       |       |
|          | Total          | 312.729        | 106 |             |       |       |
| Location | Between Groups | 16.872         | 2   | 8.436       | 7.206 | 0.001 |
|          | Within Groups  | 121.745        | 104 | 1.171       |       |       |
|          | Total          | 138.617        | 106 |             |       |       |
| Zinc     | Between Groups | 3.107          | 2   | 1.554       | 0.108 | 0.898 |
|          | Within Groups  | 1492.759       | 104 | 14.353      |       |       |
|          | Total          | 1495.867       | 106 |             |       |       |
| Copper   | Between Groups | 0.000          | 2   | 0.000       | 0.026 | 0.974 |
|          | Within Groups  | 0.234          | 104 | 0.002       |       |       |
|          | Total          | 0.234          | 106 |             |       |       |
| Cadmium  | Between Groups | 0.000          | 2   | 0.000       | 0.023 | 0.977 |
|          | Within Groups  | 0.605          | 104 | 0.006       |       |       |
|          | Total          | 0.606          | 106 |             |       |       |
| Iron     | Between Groups | 9.299          | 2   | 4.650       | 0.898 | 0.410 |
|          | Within Groups  | 538.209        | 104 | 5.175       |       |       |
|          | Total          | 547.509        | 106 |             |       |       |
| Lead     | Between Groups | 0.003          | 2   | 0.001       | .037  | .964  |
|          | Within Groups  | 3.654          | 104 | 0.035       |       |       |
|          | Total          | 3.657          | 106 |             |       |       |

**Table S3.** Pearson correlations for heavy metals in Sludge.

|         | Zinc    | Copper | Cadmium  | Iron   | Lead |
|---------|---------|--------|----------|--------|------|
| Zinc    | 1       |        |          |        |      |
| Copper  | 0.036   | 1      |          |        |      |
| Cadmium | −0.148  | 0.117  | 1        |        |      |
| Iron    | −0.315  | 0.037  | 0.219    | 1      |      |
| Lead    | 0.578** | −0.020 | −0.478** | −0.207 | 1    |

\*\*. Correlation is significant at the 0.01 level (2-tailed).

**Table S4.** ANOVA for heavy metals in sludge.

|          |                | Sum of Squares | df | Mean Square | F     | Sig.  |
|----------|----------------|----------------|----|-------------|-------|-------|
| Month    | Between Groups | 1.049          | 2  | 0.524       | 0.166 | .847  |
|          | Within Groups  | 103.951        | 33 | 3.150       |       |       |
|          | Total          | 105.000        | 35 |             |       |       |
| Location | Between Groups | 0.000          | 2  | 0.000       |       |       |
|          | Within Groups  | 0.000          | 33 | 0.000       |       |       |
|          | Total          | 0.000          | 35 |             |       |       |
| Zinc     | Between Groups | 25.954         | 2  | 12.977      | 1.051 | 0.361 |
|          | Within Groups  | 407.648        | 33 | 12.353      |       |       |
|          | Total          | 433.603        | 35 |             |       |       |
| Copper   | Between Groups | 0.883          | 2  | 0.442       | 4.096 | 0.026 |
|          | Within Groups  | 3.558          | 33 | 0.108       |       |       |
|          | Total          | 4.441          | 35 |             |       |       |
| Cadmium  | Between Groups | 0.000          | 2  | 0.000       | 0.011 | 0.989 |
|          | Within Groups  | 0.330          | 33 | 0.010       |       |       |
|          | Total          | 0.330          | 35 |             |       |       |
| Iron     | Between Groups | 245.122        | 2  | 122.561     | 1.050 | 0.361 |
|          | Within Groups  | 3850.518       | 33 | 116.682     |       |       |
|          | Total          | 4095.639       | 35 |             |       |       |
| Lead     | Between Groups | 0.166          | 2  | 0.083       | 0.164 | 0.850 |
|          | Within Groups  | 16.764         | 33 | 0.508       |       |       |
|          | Total          | 16.930         | 35 |             |       |       |

**Table S5.** Levels of heavy metals in sludge samples (mg kg<sup>-1</sup>).

| Location | Month     | Zn (mg.kg <sup>-1</sup> ) | Cu (mg.kg <sup>-1</sup> ) | Cd (mg.kg <sup>-1</sup> ) | Fe (mg.kg <sup>-1</sup> ) | Pb (mg.kg <sup>-1</sup> ) |
|----------|-----------|---------------------------|---------------------------|---------------------------|---------------------------|---------------------------|
| WWTP-A   | September | <DL                       | 0.585 ± 0.446             | <DL                       | 42 ± 1.811                | <DL                       |
|          | October   | "                         | 0.657 ± 0.167             | "                         | 36 ± 3.325                | "                         |
|          | November  | "                         | 1.168 ± 0.305             | "                         | 29 ± 0.614                | 0.099 ± 0.037             |
|          | December  | "                         | 0.425 ± 0.259             | "                         | 49 ± 12                   | <DL                       |
|          | January   | "                         | 0.876 ± 0.081             | 0.126 ± 0.004             | 36 ± 3.325                | "                         |
|          | February  | "                         | 0.724 ± 0.027             | 0.135 ± 0.002             | 44 ± 3.864                | "                         |
|          | Mean      | <DL                       | 0.739 ± 0.214             | 0.131 ± 0.003             | 39 ± 4.125                | 0.099 ± 0.037             |
|          | Range     | <DL                       | 0.425-1.168               | <DL-0.135                 | 29 - 49                   | <DL-0.099                 |
|          |           |                           |                           |                           |                           |                           |
| WWTP-B   | September | <DL                       | 0.293 ± 0.074             | <DL                       | 45 ± 3.864                | <DL                       |
|          | October   | "                         | 0.451 ± 0.006             | "                         | 42 ± 1.812                | "                         |
|          | November  | "                         | <DL                       | "                         | 28 ± 0.361                | "                         |
|          | December  | "                         | 0.66 ± 0.129              | "                         | 31 ± 1.77                 | "                         |
|          | January   | "                         | 0.413 ± 0.201             | 0.078 ± 0.003             | 43 ± 14                   | "                         |
|          | February  | "                         | 0.362 ± 0.038             | 0.122 ± 0.001             | 49 ± 3.197                | "                         |
|          | Mean      | <DL                       | 0.436 ± 0.25              | 0.1 ± 0.002               | 40 ± 9.48                 | <DL                       |
|          | Range     | <DL                       | <DL-0.66                  | <DL-0.122                 | 28 - 49                   | <DL                       |
|          |           |                           |                           |                           |                           |                           |
| WWTP-C   | September | <DL                       | 0.507 ± 0.047             | <DL                       | 36 ± 3.325                | <DL                       |
|          | October   | "                         | 0.635 ± 0.015             | "                         | 44 ± 3.864                | 0.065 ± 0.02              |
|          | November  | "                         | 0.612 ± 0.356             | "                         | 42 ± 1.811                | <DL                       |
|          | December  | "                         | 0.362 ± 0.038             | "                         | 49 ± 3.197                | "                         |

|          |     |               |               |            |              |
|----------|-----|---------------|---------------|------------|--------------|
| January  | "   | 0.437 ± 0.125 | 0.124 ± 0.002 | 29 ± 0.614 | "            |
| February | "   | 0.62 ± 0.084  | 0.128 ± 0     | 70 ± 1.201 | "            |
| Mean     | <DL | 0.529 ± 0.101 | 0.504 ± 0.001 | 45 ± 2.335 | 0.065 ± 0.02 |
| Range    | <DL | 0.362-0.635   | <DL-0.128     | 29 - 70    | <DL-0.065    |

<DL: Below Detection Limit.

Table S6. Levels of heavy metals in wastewater and water from WWTP-A (mg L<sup>-1</sup>).

| Location   | Month     | Zn (mg L <sup>-1</sup> ) | Cu (mg L <sup>-1</sup> ) | Cd (mg L <sup>-1</sup> ) | Fe (mg L <sup>-1</sup> ) | Pb (mg L <sup>-1</sup> ) | Total (mg L <sup>-1</sup> ) |
|------------|-----------|--------------------------|--------------------------|--------------------------|--------------------------|--------------------------|-----------------------------|
| Influent   | September | <DL                      | <DL                      | <DL                      | 6.588 ± 3.139            | <DL                      | 6.59 ± 2.22                 |
|            | October   | "                        | "                        | "                        | 0.712 ± 0.234            | "                        | 0.71 ± 0.17                 |
|            | November  | "                        | "                        | "                        | 0.414 ± 0.03             | "                        | 0.41 ± 0.16                 |
|            | December  | "                        | "                        | "                        | 0.595 ± 0.157            | "                        | 0.60 ± 0.15                 |
|            | January   | <DL                      | 0.03 ± 0.006             | 0.101 ± 0                | <DL                      | "                        | 0.14 ± 0.06                 |
|            | February  | "                        | 0.053 ± 0                | 0.122 ± 0.002            | "                        | "                        | 0.17 ± 0.05                 |
|            | Mean      | <DL                      | 0.042 ± 0.003            | 0.112 ± 0.001            | 2.077 ± 0.89             | <DL                      | 1.436 ± 0.595               |
|            | Range     | <DL                      | <DL-0.053                | <DL-0.122                | <DL-6.588                | <DL                      |                             |
| Effluent   | September | <DL                      | <DL                      | <DL                      | 0.292 ± 0.038            | <DL                      | <DL                         |
|            | October   | "                        | "                        | "                        | 0.33 ± 0.015             | "                        | 0.33 ± 0.18                 |
|            | November  | "                        | "                        | "                        | 0.233 ± 0.054            | "                        | 0.23 ± 0.17                 |
|            | December  | "                        | "                        | "                        | 0.263 ± 0.002            | "                        | 0.26 ± 0.15                 |
|            | January   | "                        | 0.036 ± 0.004            | 0.098 ± 0.001            | <DL                      | "                        | 0.14 ± 0.06                 |
|            | February  | "                        | 0.047 ± 0                | 0.129 ± 0                | "                        | "                        | 0.18 ± 0.05                 |
|            | Mean      | <DL                      | 0.042 ± 0.002            | 0.114 ± 0.001            | 0.28 ± 0.027             | <DL                      | 0.238 ± 0.059               |
|            | Range     | <DL                      | <DL-0.047                | <DL-0.129                | <DL-0.33                 | <DL                      |                             |
| Upstream   | % RE      | N/A                      | 0                        | 0                        | 86.6                     | N/A                      | N/A                         |
|            | September | <DL                      | <DL                      | <DL                      | 0.878 ± 0.217            | <DL                      | <DL                         |
|            | October   | "                        | "                        | "                        | 0.798 ± 0.057            | "                        | 0.80 ± 0.19                 |
|            | November  | "                        | "                        | "                        | 0.576 ± 0.005            | "                        | 0.58 ± 0.16                 |
|            | December  | "                        | "                        | "                        | 0.341 ± 0.024            | "                        | 0.34 ± 0.15                 |
|            | January   | "                        | 0.025 ± 0.005            | 0.10 ± 0.001             | <DL                      | "                        | 0.13 ± 0.07                 |
|            | February  | "                        | 0.057 ± 0.003            | 0.123 ± 0                | "                        | "                        | 0.18 ± 0.05                 |
|            | Mean      | <DL                      | 0.041 ± 0.004            | 0.112 ± 0.001            | 0.648 ± 0.076            | <DL                      | 0.483 ± 0.052               |
| Downstream | Range     | <DL                      | <DL-0.057                | <DL-0.123                | <DL-0.878                | <DL                      |                             |
|            | September | <DL                      | <DL                      | <DL                      | 0.711 ± 0.415            | <DL                      | <DL                         |
|            | October   | "                        | "                        | "                        | 0.634 ± 0.004            | "                        | 0.63 ± 0.17                 |
|            | November  | "                        | "                        | "                        | 0.629 ± 0                | "                        | 0.63 ± 0.15                 |
|            | December  | "                        | "                        | "                        | 0.401 ± 0.045            | "                        | 0.40 ± 0.14                 |
|            | January   | "                        | 0.042 ± 0.037            | 0.105 ± 0.084            | <DL                      | "                        | 0.15 ± 0.07                 |
|            | February  | "                        | 0.057 ± 0.001            | 0.123 ± 0                | "                        | "                        | 0.19 ± 0.05                 |
|            | Mean      | <DL                      | 0.05 ± 0.019             | 0.114 ± 0.042            | 0.594 ± 0.116            | <DL                      | 0.45 ± 0.1                  |
|            | Range     | <DL                      | <DL-0.058                | <DL-0.125                | <DL-0.711                | <DL                      |                             |

<DL: Below Detection Limit; %RE: Percentage removal efficiency; N/A: Not applicable.

Table S7. Levels of heavy metals in wastewater and water from WWTP-B (mg L<sup>-1</sup>).

| Location | Month     | Zn (mg L <sup>-1</sup> ) | Cu (mg L <sup>-1</sup> ) | Cd (mg L <sup>-1</sup> ) | Fe (mg L <sup>-1</sup> ) | Pb (mg L <sup>-1</sup> ) | Total (mg L <sup>-1</sup> ) |
|----------|-----------|--------------------------|--------------------------|--------------------------|--------------------------|--------------------------|-----------------------------|
| Influent | September | <DL                      | <DL                      | <DL                      | <DL                      | <DL                      | <DL                         |
|          | October   | "                        | "                        | "                        | 0.627 ± 0.061            | "                        | "                           |
|          | November  | "                        | "                        | "                        | 0.396 ± 0.02             | "                        | "                           |
|          | December  | "                        | "                        | "                        | 0.556 ± 0.016            | "                        | "                           |
|          | January   | "                        | 0.025 ± 0.022            | 0.09 ± 0.002             | "                        | "                        | 0.12 ± 0.09                 |
|          | February  | "                        | 0.069 ± 0.002            | 0.125 ± 0.002            | 2.257 ± 0.438            | "                        | 2.46 ± 0.84                 |
|          | Mean      | <DL                      | 0.047 ± 0.012            | 0.108 ± 0.002            | 0.959 ± 0.134            | <DL                      | 0.691 ± 0.094               |
|          | Range     | <DL                      | <DL-0.069                | <DL-0.125                | <DL-2.257                | <DL                      |                             |

|                 |           |     |               |               |               |     |               |
|-----------------|-----------|-----|---------------|---------------|---------------|-----|---------------|
| <b>Effluent</b> | September | <DL | <DL           | <DL           | 0.636 ± 0.012 | <DL | <DL           |
|                 | October   | "   | "             | "             | 0.315 ± 0.254 | "   | "             |
|                 | November  | "   | "             | "             | 0.473 ± 0.07  | "   | "             |
|                 | December  | "   | "             | "             | 0.429 ± 0.001 | "   | "             |
|                 | January   | "   | 0.026 ± 0.003 | 0.097 ± 0.003 | "             | "   | 0.13 ± 0.09   |
|                 | February  | "   | 0.046 ± 0.002 | 0.123 ± 0.001 | "             | "   | 0.17 ± 0.05   |
|                 | Mean      | <DL | 0.036 ± 0.003 | 0.11 ± 0.002  | 0.463 ± 0.084 | <DL | 0.358 ± 0.058 |
|                 | Range     | <DL | <DL-0.046     | <DL-0.123     | <DL-0.636     | <DL |               |
|                 | % RE      | N/A | 23.4          | 0             | 34.7          | N/A | N/A           |

<DL: Below Detection Limit; %RE: Percentage removal efficiency; N/A: Not applicable.

**Table S8.** Levels of heavy metals in wastewater and water from WWTP-C (mg.L<sup>-1</sup>).

| Location          | Month     | Zn (mg L <sup>-1</sup> ) | Cu (mg L <sup>-1</sup> ) | Cd (mg L <sup>-1</sup> ) | Fe (mg L <sup>-1</sup> ) | Pb (mg L <sup>-1</sup> ) | Total (mg L <sup>-1</sup> ) |
|-------------------|-----------|--------------------------|--------------------------|--------------------------|--------------------------|--------------------------|-----------------------------|
| <b>Influent</b>   | September | <DL                      | <DL                      | <DL                      | 0.877 ± 0.19             | <DL                      | <DL                         |
|                   | October   | "                        | "                        | "                        | 1.805 ± 0.381            | "                        | "                           |
|                   | November  | "                        | "                        | "                        | 0.454 ± 0.001            | "                        | "                           |
|                   | December  | "                        | "                        | "                        | 0.412 ± 0.065            | "                        | "                           |
|                   | January   | "                        | 0.029 ± 0.003            | 0.103 ± 0.003            | "                        | "                        | 0.13 ± 0.08                 |
|                   | February  | "                        | 0.049 ± 0.002            | 0.129 ± 0.001            | "                        | "                        | 0.18 ± 0.05                 |
|                   | Mean      | <DL                      | 0.039 ± 0.003            | 0.116 ± 0.002            | 0.887 ± 0.159            | <DL                      | 0.643 ± 0.108               |
|                   | Range     | <DL                      | <DL-0.049                | <DL-0.129                | <DL-1.806                | <DL                      | -                           |
|                   | % RE      | N/A                      | 0                        | 0                        | 56.9                     | N/A                      | N/A                         |
| <b>Effluent</b>   | September | <DL                      | <DL                      | <DL                      | 0.557 ± 0.071            | <DL                      | <DL                         |
|                   | October   | "                        | "                        | "                        | 0.273 ± 0.025            | "                        | "                           |
|                   | November  | "                        | "                        | "                        | 0.356 ± 0.007            | "                        | "                           |
|                   | December  | "                        | "                        | "                        | 0.342 ± 0.01             | "                        | "                           |
|                   | January   | "                        | 0.028 ± 0.001            | 0.107 ± 0.004            | <DL                      | "                        | 0.14 ± 0.09                 |
|                   | February  | "                        | 0.06 ± 0.003             | 0.129 ± 0                | "                        | "                        | 0.19 ± 0.05                 |
|                   | Mean      | <DL                      | 0.044 ± 0.002            | 0.118 ± 0.002            | 0.382 ± 0.028            | <DL                      | 0.309 ± 0.02                |
|                   | Range     | <DL                      | <DL-0.06                 | <DL-0.129                | <DL-0.557                | <DL                      | -                           |
|                   | % RE      | N/A                      | 0                        | 0                        | 56.9                     | N/A                      | N/A                         |
| <b>Downstream</b> | September | <DL                      | <DL                      | <DL                      | 0.367 ± 0.048            | <DL                      | <DL                         |
|                   | October   | "                        | "                        | "                        | 0.61 ± 0.223             | "                        | "                           |
|                   | November  | "                        | "                        | "                        | 0.37 ± 0.033             | "                        | "                           |
|                   | December  | "                        | "                        | "                        | 0.332 ± 0.046            | "                        | "                           |
|                   | January   | "                        | 0.035 ± 0.003            | 0.109 ± 0.001            | "                        | "                        | 0.15 ± 0.09                 |
|                   | February  | "                        | 0.05 ± 0.001             | 0.132 ± 0                | "                        | "                        | 0.18 ± 0.05                 |
|                   | Mean      | <DL                      | 0.043 ± 0.002            | 0.121 ± 0.001            | 0.42 ± 0.088             | <DL                      | 0.334 ± 0.059               |
|                   | Range     | <DL                      | <DL-0.05                 | <DL-0.132                | <DL-0.61                 | <DL                      | -                           |
|                   | % RE      | N/A                      | 0                        | 0                        | 56.9                     | N/A                      | N/A                         |

<DL: Below Detection Limit; %RE: Percentage removal efficiency; N/A: Not applicable.
